# Supplementary material for: A high-density nickel–cobalt alloy embedded in nitrogen-doped carbon nanosheets for the hydrogen evolution reaction
Source: Royal Society of Chemistry journal article supplement (doi:10.1039/d2nr00053a), 2022-01-01
Supplement: d2nr00053a1.pdf [file d2nr00053a1.pdf]

## Supporting information

### High-Density Nickel–Cobalt Alloy Embedded in Nitrogen-Doped Carbon Nanosheets for Hydrogen Evolution Reaction

Lihua Hu,<sup>a#</sup> Jialing Shi,<sup>a#</sup> Zhiguang Peng,<sup>a</sup> Zefeng Zheng,<sup>a</sup> Huafeng Dong<sup>b</sup> and Tiejun Wang<sup>a,c\*</sup>

<sup>a</sup> School of Chemical Engineering and Light Industry, Guangdong University of Technology, Guangzhou 510006, PR China

<sup>b</sup> School of Physics and Optoelectronic Engineering, Guangdong University of Technology, Guangzhou 510006, PR China

<sup>c</sup> Guangzhou Key Laboratory of Clean Transportation Energy and Chemistry, Guangdong University of Technology, Guangzhou 510006, PR China

\* Corresponding author: [tjwang@gdut.edu.cn](mailto:tjwang@gdut.edu.cn)

# These authors contributed equally in this work

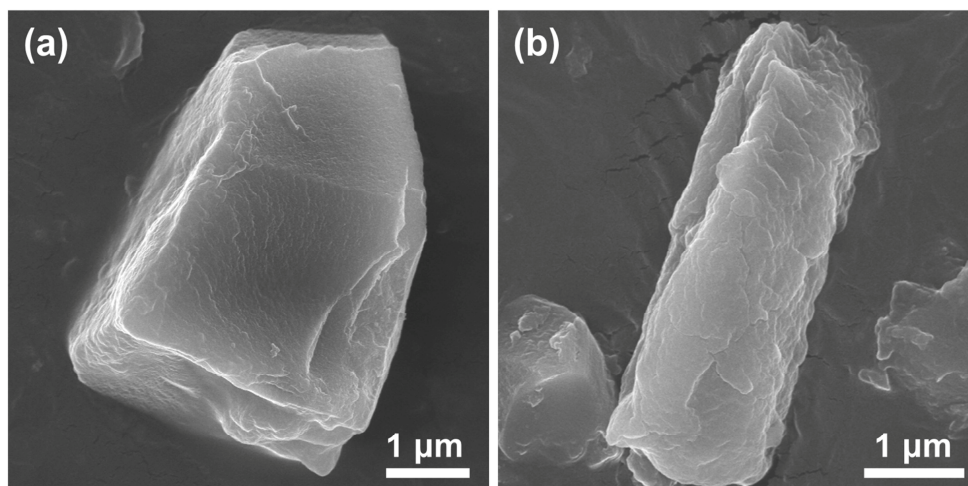

**Figure S1.** SEM images of the Ni<sub>7</sub>Co<sub>3</sub>-CS precursor.

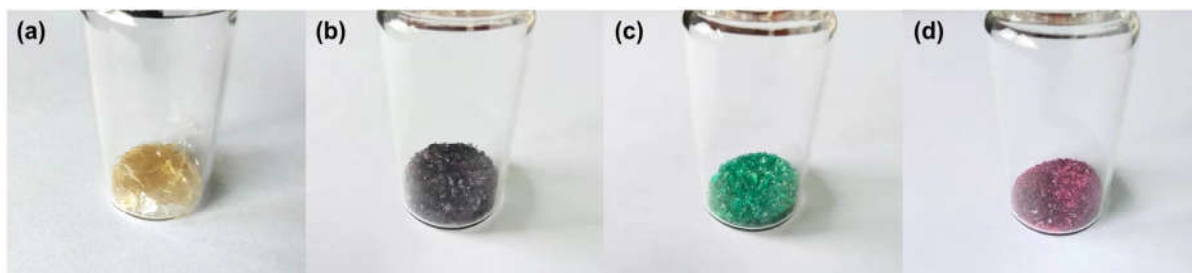

**Figure S2.** Photographs of as-prepared (a) chitosan, (b) Ni<sub>7</sub>Co<sub>3</sub>-CS, (c) Ni-CS, and (d) Co-CS precursors.

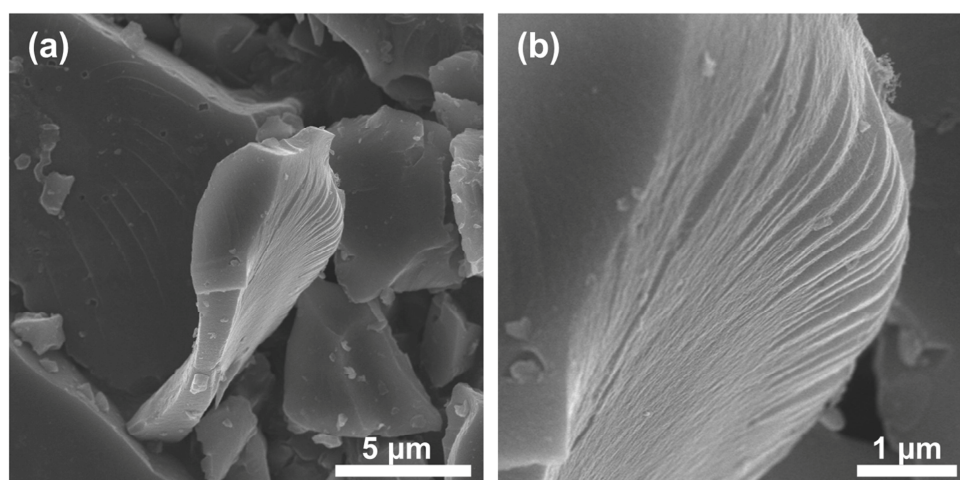

**Figure S3.** SEM images of NC.

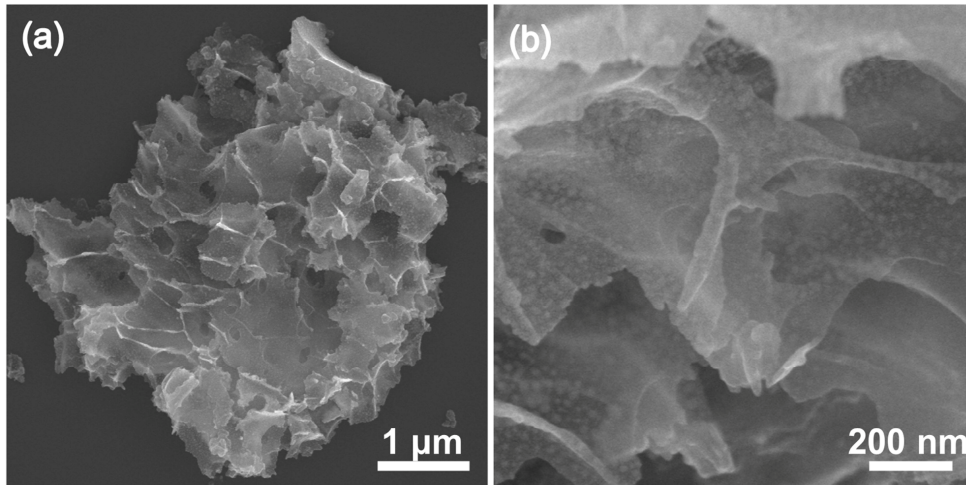

**Figure S4.** SEM images of Ni/NC.

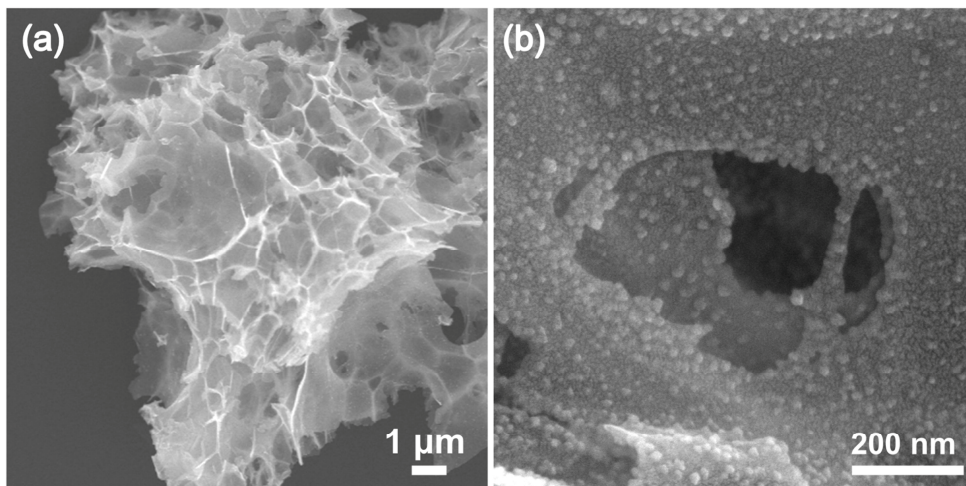

**Figure S5.** SEM images of Co/NC.

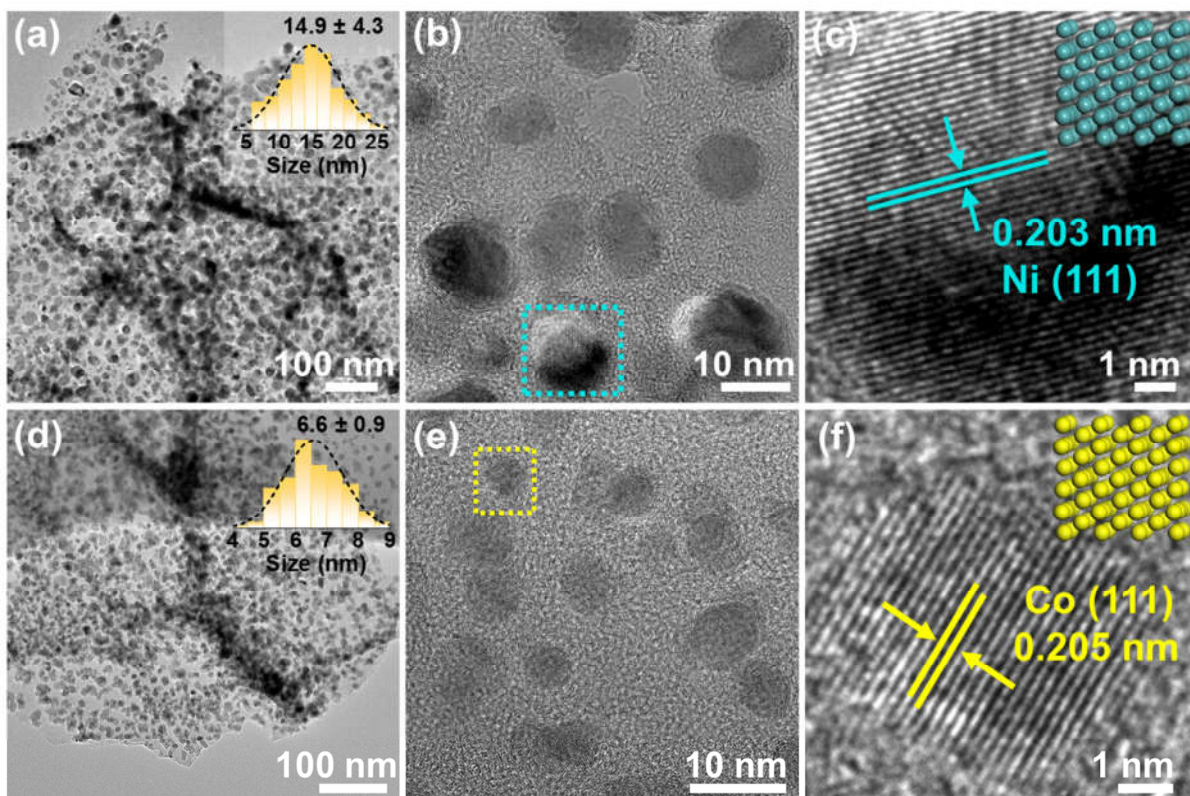

**Figure S6.** (a) TEM image (inset shows the particle size distribution), and (b-c) HR-TEM images of Ni/NC; (d) TEM image (inset shows the particle size distribution), and (e-f) HR-TEM images of Co/NC.

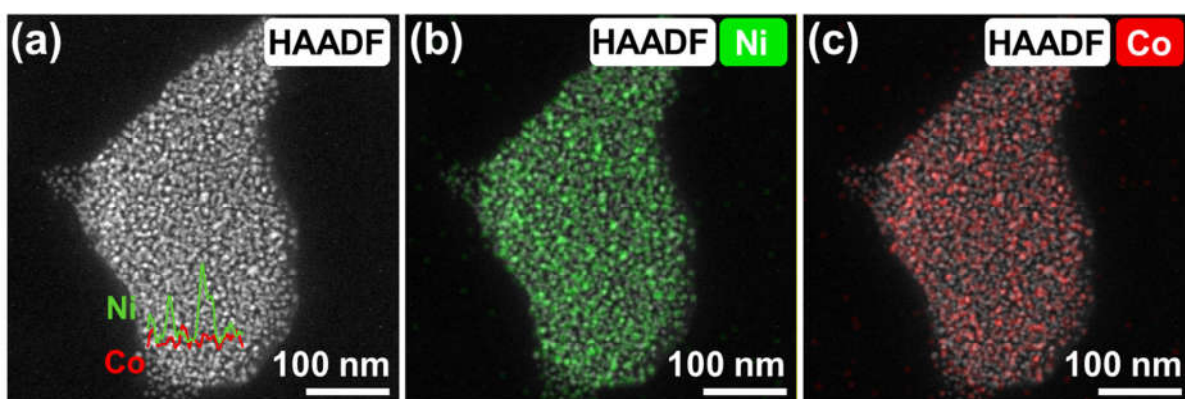

**Figure S7.** High annular dark-field scanning TEM (HAADF-STEM) and corresponding elemental mapping images of  $\text{Ni}_7\text{Co}_3/\text{NC-500}$ .

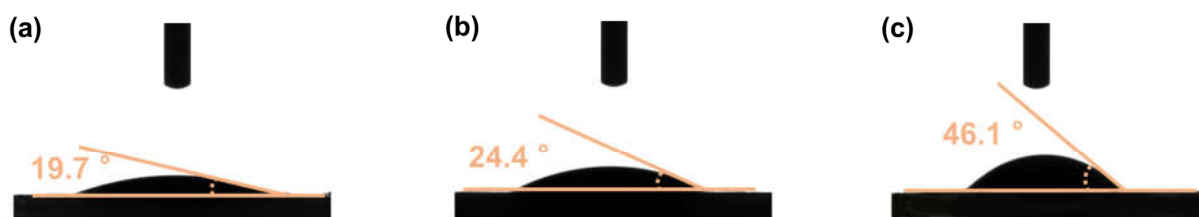

**Figure S8.** Water contact angle of (a)  $\text{Ni}_7\text{Co}_3/\text{NC-500}$ , (b)  $\text{Ni}/\text{NC}$ , and (c)  $\text{Co}/\text{NC}$ .

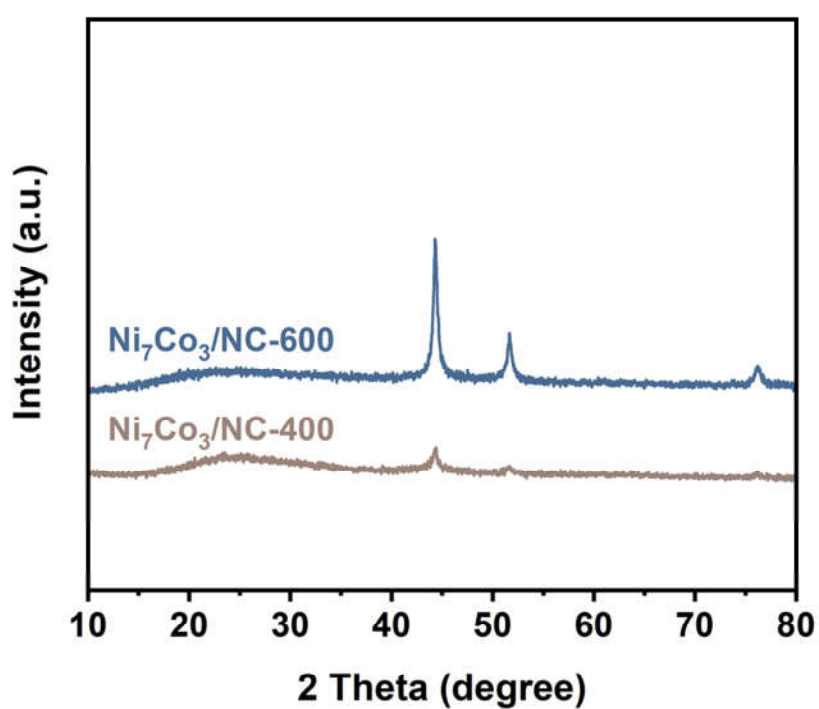

**Figure S9.** XRD patterns of  $\text{Ni}_7\text{Co}_3/\text{NC-600}$  and  $\text{Ni}_7\text{Co}_3/\text{NC-400}$ .

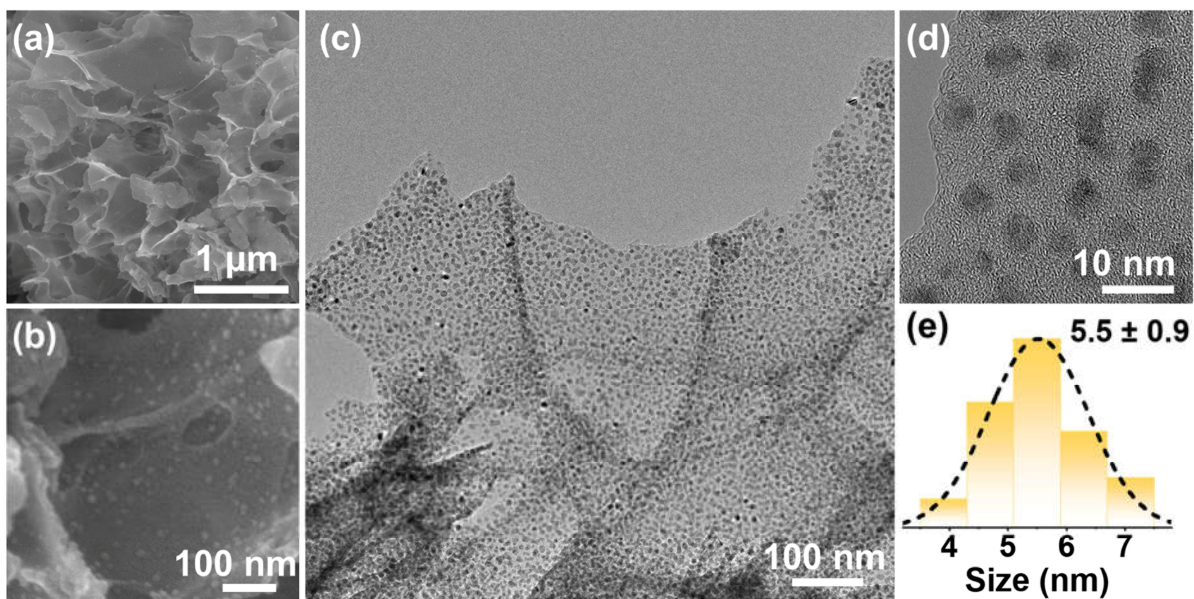

**Figure S10.** (a-b) SEM images, (c) TEM image, and (d) HR-TEM image of Ni<sub>7</sub>Co<sub>3</sub>/NC-400. (e) The particle size distribution in c.

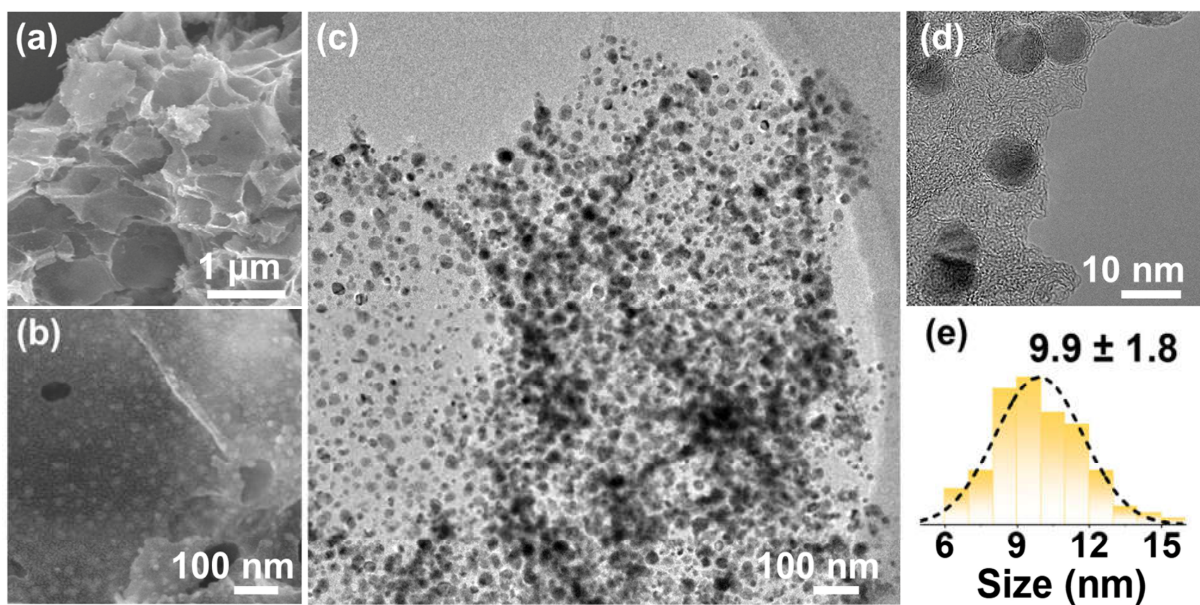

**Figure S11.** (a-b) SEM images, (c) TEM image, and (d) HR-TEM image of Ni<sub>7</sub>Co<sub>3</sub>/NC-600. (e) The particle size distribution in c.

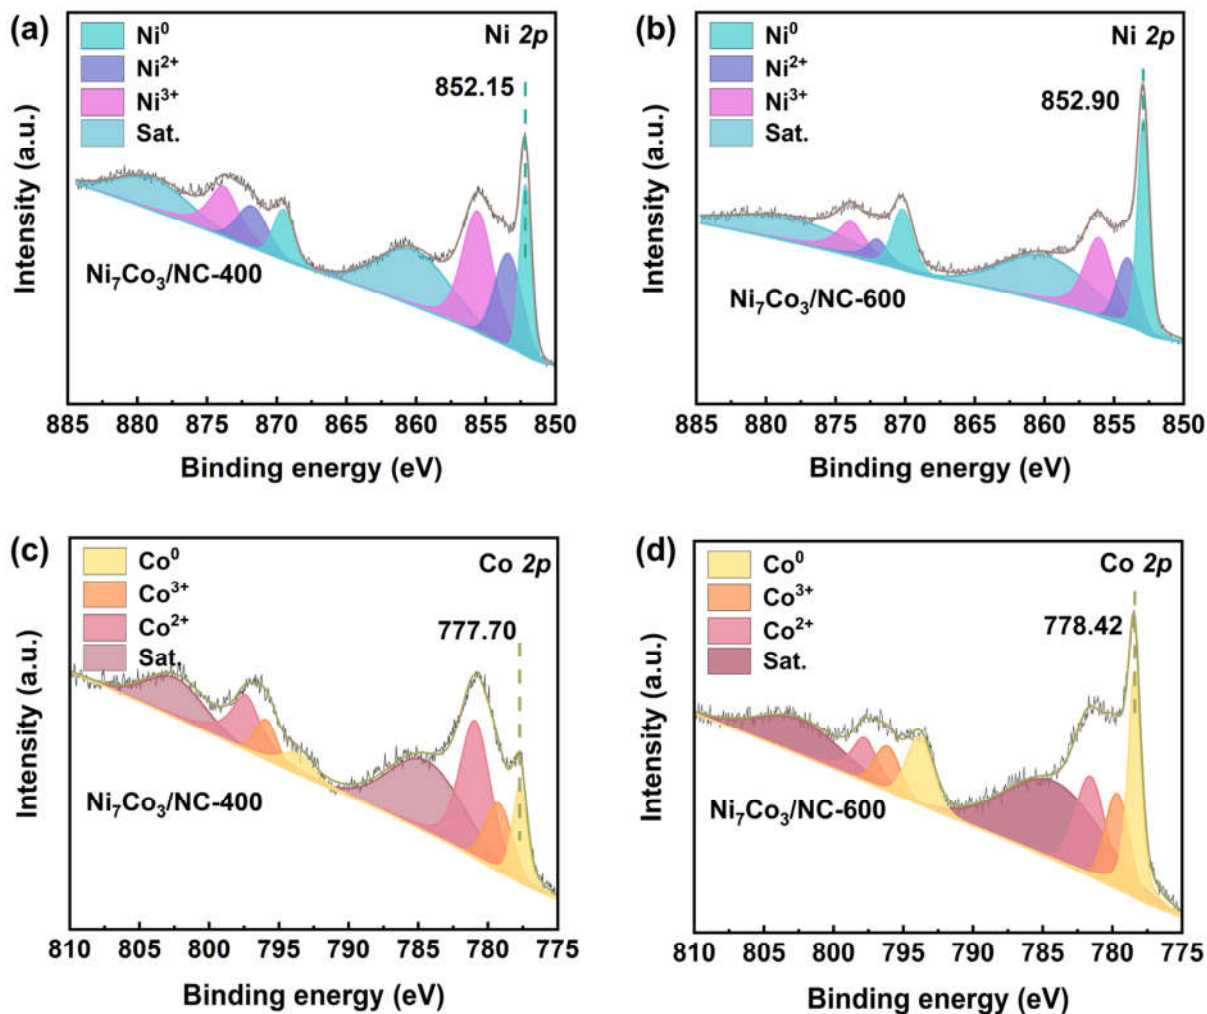

**Figure S12.** High resolution XPS spectra of Ni 2p of (a)  $\text{Ni}_7\text{Co}_3/\text{NC-400}$  and (b)  $\text{Ni}_7\text{Co}_3/\text{NC-600}$ . High resolution XPS spectra of Co 2p of (c)  $\text{Ni}_7\text{Co}_3/\text{NC-400}$  and (d)  $\text{Ni}_7\text{Co}_3/\text{NC-600}$ .

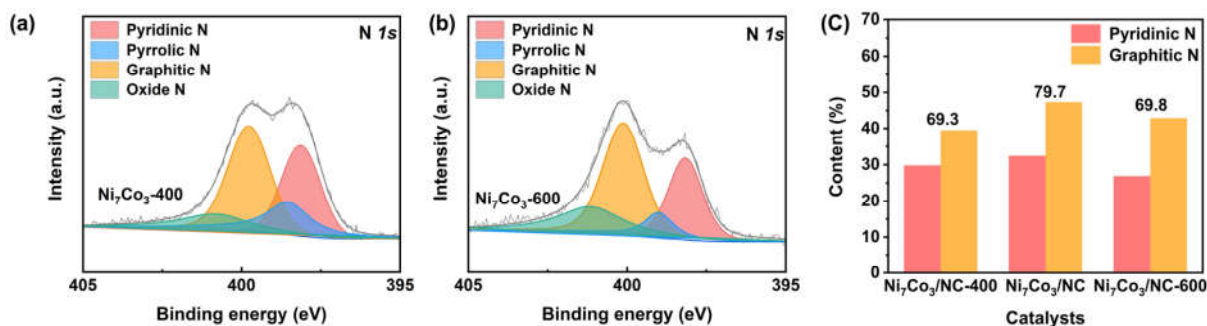

**Figure S13.** High resolution XPS spectra of N 1s of (a)  $\text{Ni}_7\text{Co}_3/\text{NC-400}$  and (b)  $\text{Ni}_7\text{Co}_3/\text{NC-600}$ . (c) Surface pyridinic N and graphitic N percentages of  $\text{Ni}_7\text{Co}_3/\text{NC-T}$  determined by N 1s of XPS profile.

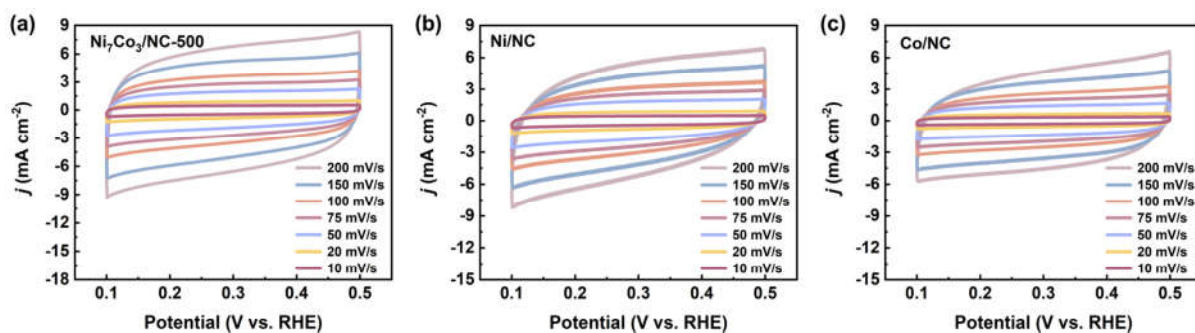

**Figure S14.** Cyclic voltammograms of (a) Ni<sub>7</sub>Co<sub>3</sub>/NC-500, (b) Ni/NC, and (c) Co/NC with various scan rates in 1 M KOH solution.

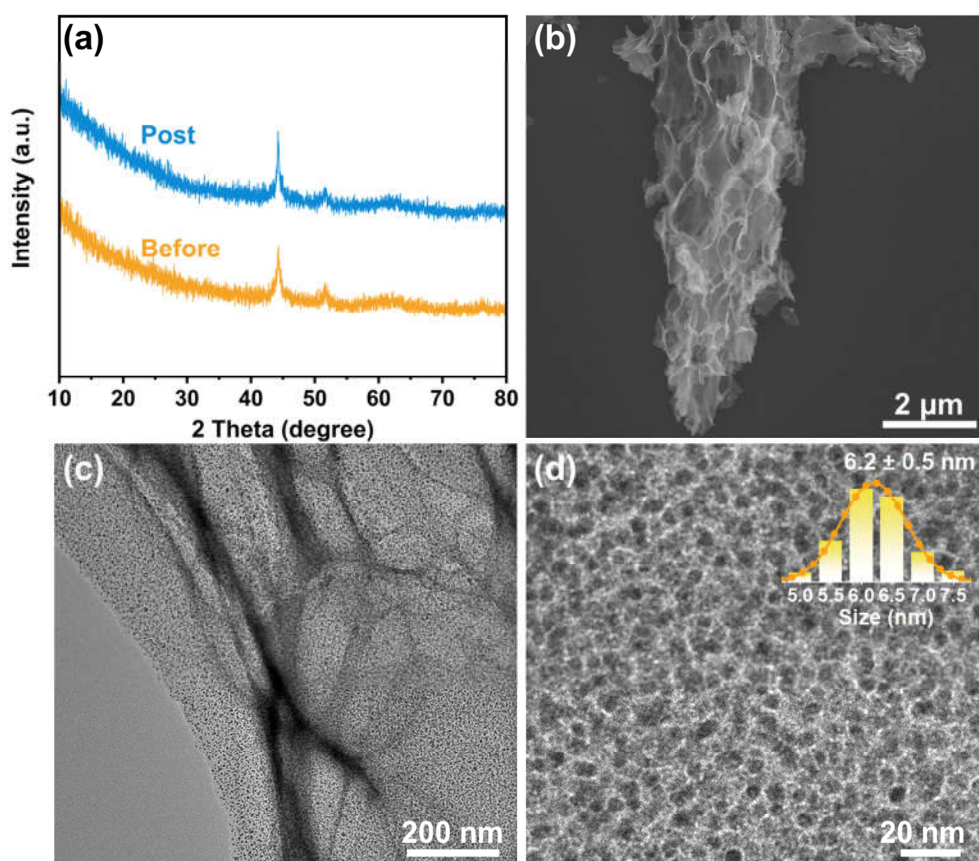

**Figure S15.** (a) XRD patterns of Ni<sub>7</sub>Co<sub>3</sub>/NC-500 before and after reaction 12 h; (b) SEM image and (c-d) TEM images of Ni<sub>7</sub>Co<sub>3</sub>/NC-500 after 12 h stability test.



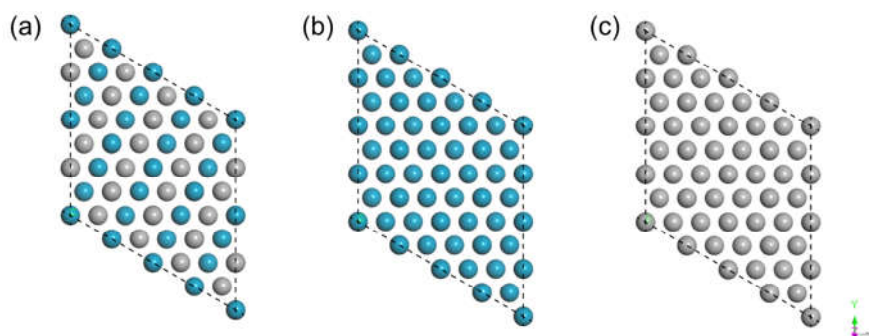

**Figure S16.** The structure of (a) NiCo (111), (b) Ni (111), and (c) Co (111) (Ni: blue, Co: grey).

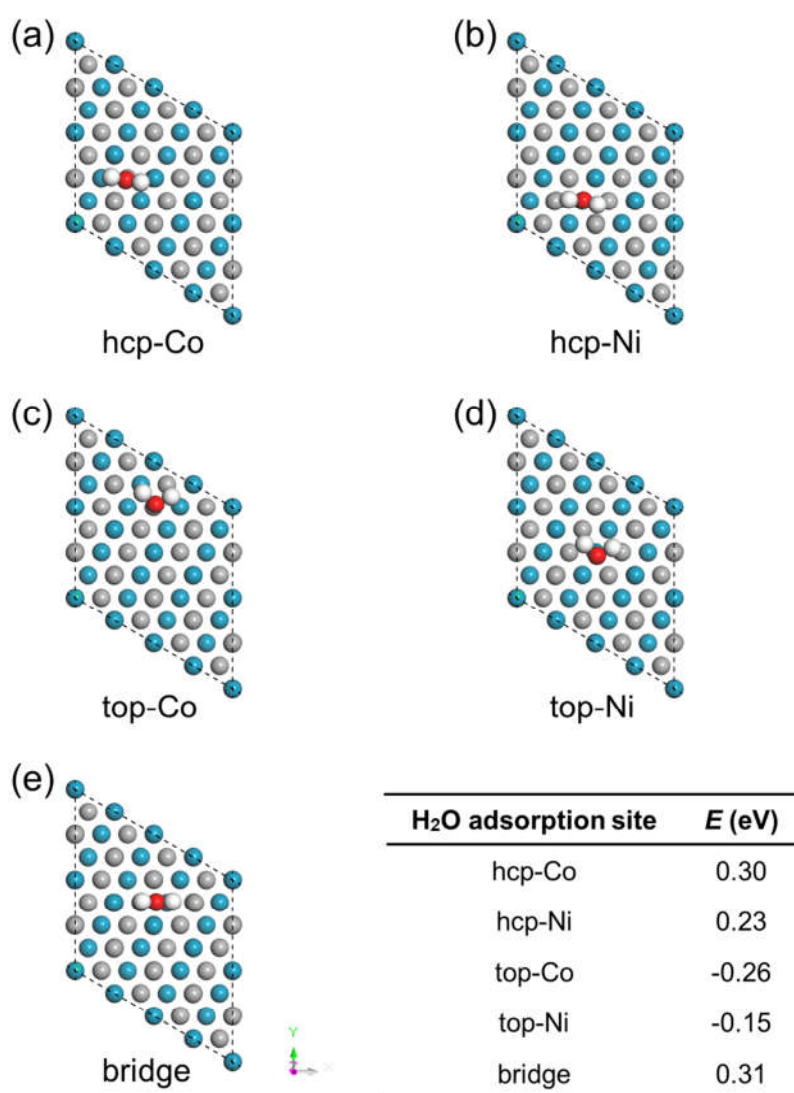

**Figure S17.** Determination of the possible adsorption site of water on NiCo(111) surface. The corresponding water adsorption energy are listed in the table on right (Ni: blue, Co: grey, O: red and H: white).

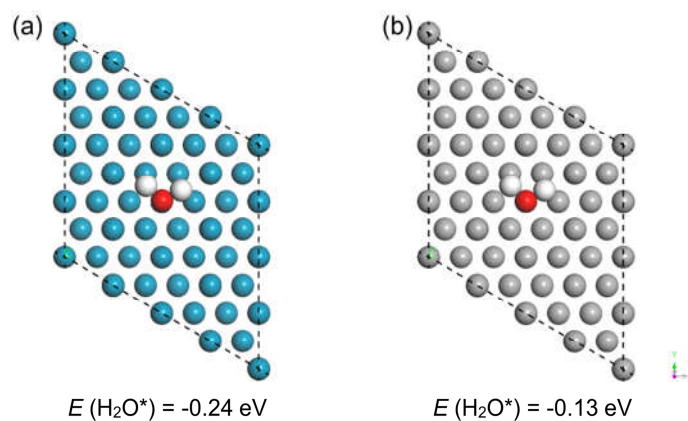

**Figure S18.** The water adsorption energy on **(a)** Ni (111) and **(b)** Co (111) (Ni: blue, Co: grey, O: red and H: white).

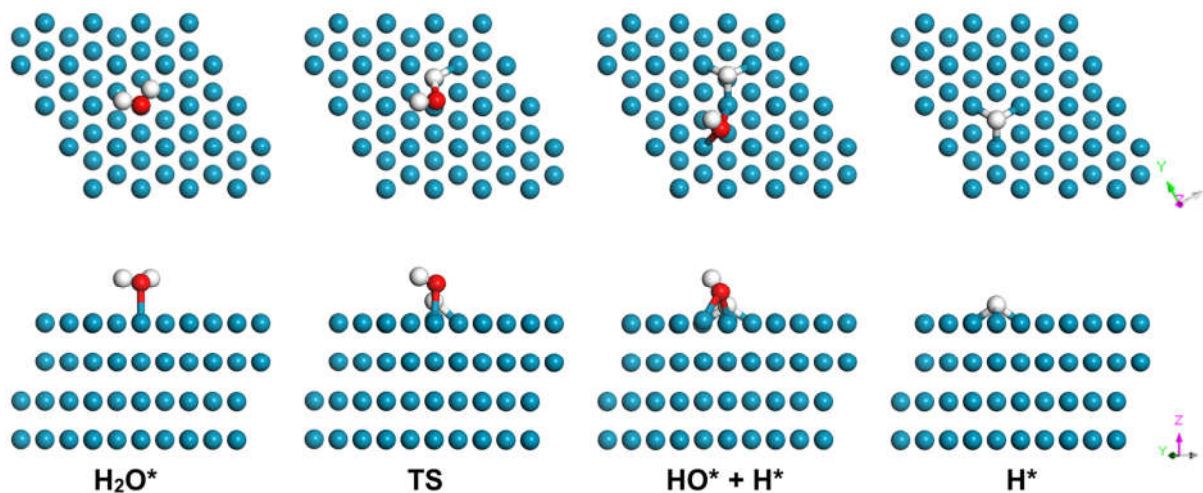

**Figure S19.** Top and side views of structures of the Ni (111) during alkaline HER process (Ni: blue, O: red and H: white).

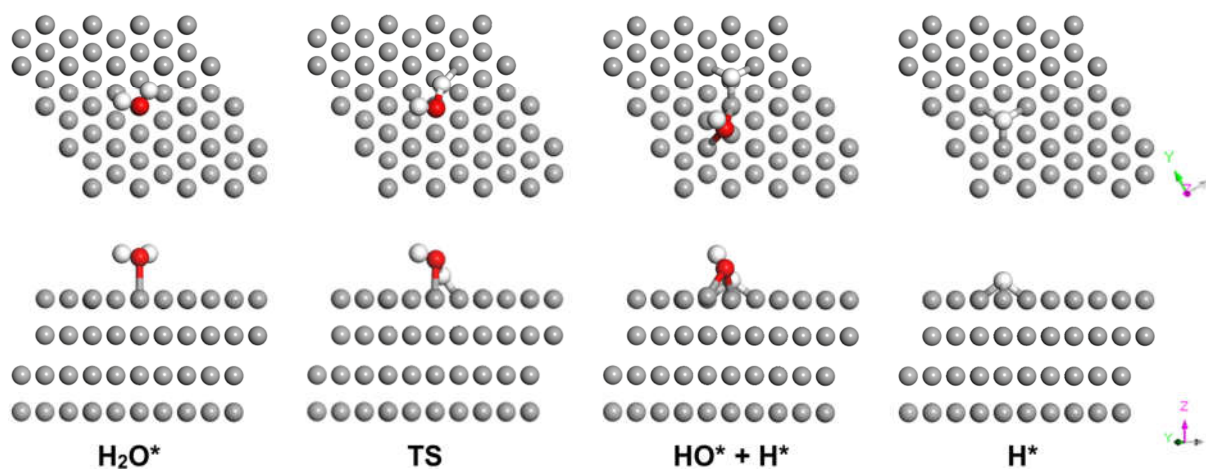

**Figure S20.** Top and side views of structures of the Co (111) during alkaline HER process (Co: grey, O: red and H: white).

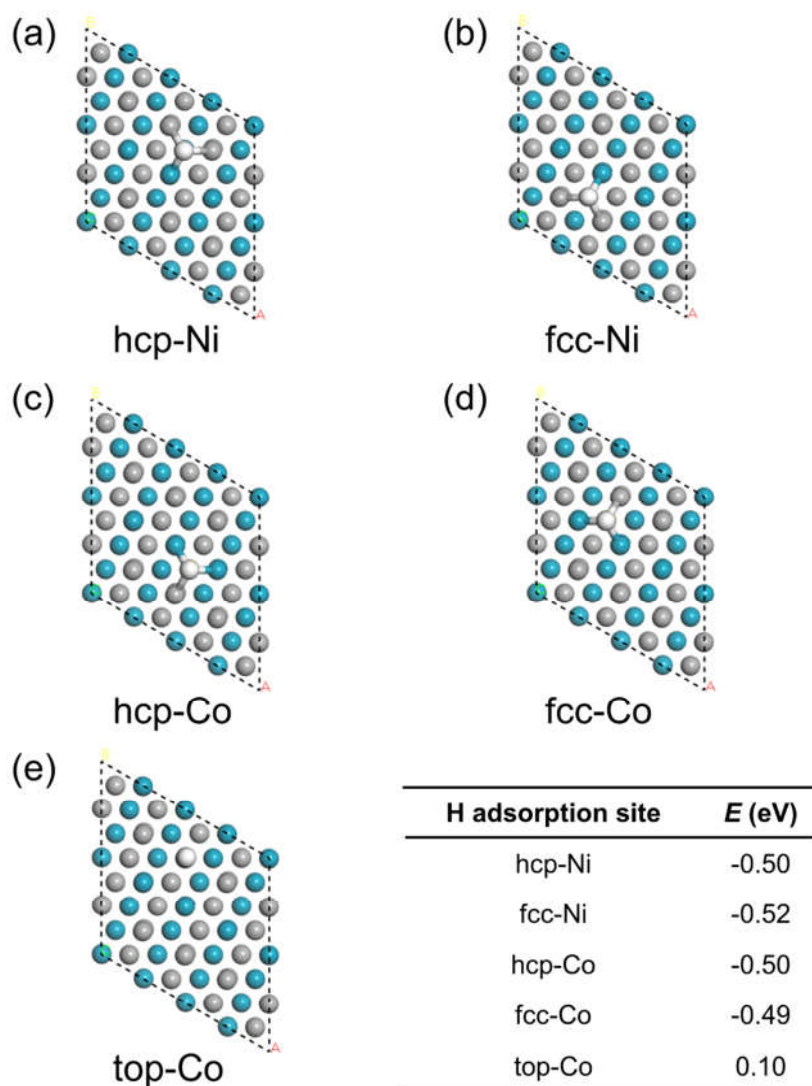

**Figure S21.** Determination of the possible adsorption site of H on NiCo(111) surface; the corresponding H adsorption energy are listed in the table on right (Ni: blue, Co: grey, and H: white).

**Table S1.** Metal content in Ni<sub>7</sub>Co<sub>3</sub>/NC-500, Ni /NC, and Co /NC determined by ICP-MS.

| Catalysts                               | Ni (wt%) | Co (wt%) | n(Ni): n(Co) |
|-----------------------------------------|----------|----------|--------------|
| Ni <sub>7</sub> Co <sub>3</sub> /NC-500 | 47       | 21       | 2.24         |
| Ni/NC                                   | 72       | -        | -            |
| Co/NC                                   | -        | 57       | -            |

**Table S2.** Metal content in Ni<sub>7</sub>Co<sub>3</sub>/NC-400 and Ni<sub>7</sub>Co<sub>3</sub>/NC-600 determined by ICP-MS.

| Catalysts                               | Ni (wt%) | Co (wt%) | n(Ni): n(Co) |
|-----------------------------------------|----------|----------|--------------|
| Ni <sub>7</sub> Co <sub>3</sub> /NC-400 | 37       | 17       | 2.17         |
| Ni <sub>7</sub> Co <sub>3</sub> /NC-600 | 54       | 24       | 2.25         |

**Table S3.** Summary of the HER performances of Ni<sub>7</sub>Co<sub>3</sub>/NC-500, Ni/NC, and Co/NC in 1 M KOH solution.

| Catalysts                               | $\eta_{10}$<br>(mV) | $\eta_{50}$<br>(mV) | Tafel Slope<br>(mV dec <sup>-1</sup> ) | $C_{dl}$ <sup>(a)</sup><br>(mF cm <sup>-2</sup> ) | $R_{ct}$ <sup>(b)</sup><br>(ohm) | $j_0$ <sup>(c)</sup><br>(mA cm <sup>-2</sup> ) |
|-----------------------------------------|---------------------|---------------------|----------------------------------------|---------------------------------------------------|----------------------------------|------------------------------------------------|
| Ni <sub>7</sub> Co <sub>3</sub> /NC-500 | 90                  | 175                 | 64                                     | 32.5                                              | 11.19                            | $7.4 \times 10^{-1}$                           |
| Ni/NC                                   | 130                 | 230                 | 82                                     | 25.8                                              | 14.54                            | $4.4 \times 10^{-1}$                           |
| Co/NC                                   | 210                 | 330                 | 150                                    | 22.5                                              | 37.69                            | $1.5 \times 10^{-1}$                           |

<sup>a)</sup> Data were calculated according to the CV results;

<sup>b)</sup> Data were measured at  $\eta = 200$  mV;

<sup>c)</sup> Exchange current densities ( $j_0$ ) were obtained from Tafel curves using extrapolation methods.
